# Supplementary material
Source: Springer Nature journal article supplement (https://www.springermedizin.de/resource/supplementary/12943_2012_1165_MOESM7_ESM.pdf/9552548)

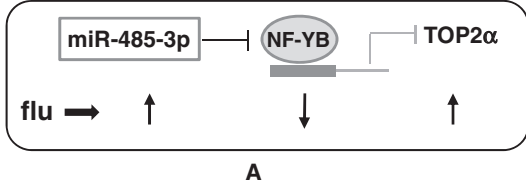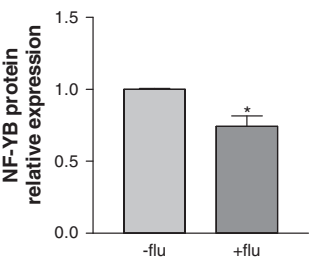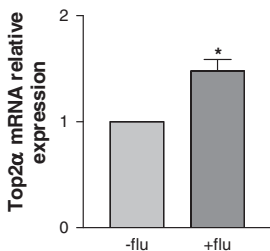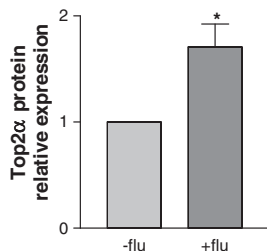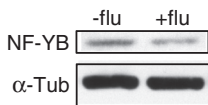

**B**

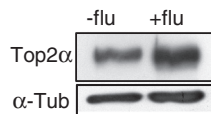

**D**

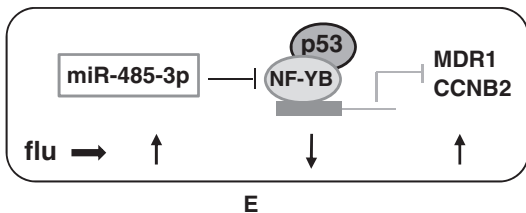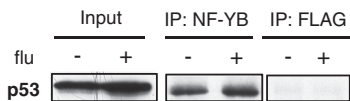

**F**

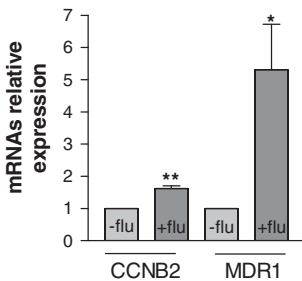

**G**

Supplement: MOESM7 [file 9552548]
